CORRECTION

# Correction: Antenna Mechanism of Length Control of Actin Cables

The PLOS Computational Biology Staff

There is a typographical error in Equation 4 in the main text. The equation is also included in Text S1. Please view the correct version of the equation here:

$$P(l) = \left(\frac{r}{d}\right)^l \frac{\left(\frac{k_{off}}{w}\right)^{l-1}}{\left(\frac{\Gamma\left(\frac{k_{off}}{w}+l\right)}{\Gamma\left(\frac{k_{off}}{w}+1\right)}\right)} \left( \frac{e^{\frac{k_{off}}{d} \frac{r}{w}} k_{off} r (k_{off} - w) \left(\frac{k_{off}}{d} \frac{r}{w}\right)^{-\left(\frac{k_{off}}{w}\right)} \left( \Gamma\left(\frac{k_{off}-w}{w}\right) - \Gamma\left(-1 + \frac{k_{off}}{w}, \frac{k_{off}}{d} \frac{r}{w}\right) \right)}{dw^2} \right)^{-1}$$

This equation in reduced form is:

$$P(l) = \frac{\left(\frac{rk_{off}}{dw}\right)^{\frac{k_{off}}{w}+l-1} e^{-\left(\frac{k_{off}}{d} \frac{r}{w}\right)} \Gamma\left(\frac{k_{off}}{w}-1\right)}{\Gamma\left(\frac{k_{off}}{w}+l\right)} \left( \Gamma\left(\frac{k_{off}}{w}-1\right) - \Gamma\left(\frac{k_{off}}{w}-1, \frac{k_{off}}{d} \frac{r}{w}\right) \right)^{-1}$$

## Reference

1. Mohapatra L, Goode BL, Kondev J (2015) Antenna Mechanism of Length Control of Actin Cables. PLoS Comput Biol 11(6): e1004160. doi:[10.1371/journal.pcbi.1004160](https://doi.org/10.1371/journal.pcbi.1004160) PMID: [26107518](https://pubmed.ncbi.nlm.nih.gov/26107518/)

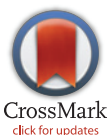

## OPEN ACCESS

**Citation:** The PLOS Computational Biology Staff (2016) Correction: Antenna Mechanism of Length Control of Actin Cables. PLoS Comput Biol 12(3): e1004830. doi:[10.1371/journal.pcbi.1004830](https://doi.org/10.1371/journal.pcbi.1004830)

**Published:** March 11, 2016

**Copyright:** © 2016 The PLOS Computational Biology Staff. This is an open access article distributed under the terms of the [Creative Commons Attribution License](https://creativecommons.org/licenses/by/4.0/), which permits unrestricted use, distribution, and reproduction in any medium, provided the original author and source are credited.
